# Supplementary material for: Longitudinal characterisation of B and T-cell immune responses after the booster dose of COVID-19 mRNA-vaccine in people with multiple sclerosis using different disease-modifying therapies
Source: PubMed Central journal article supplement — J Neurol Neurosurg Psychiatry. 2022 Dec 15;94(4):290–9. doi: 10.1136/jnnp-2022-330175 (PMC10086471; doi:10.1136/jnnp-2022-330175), 2022-12-15
Supplement: jnnp-2022-330175supp001.pdf [file jnnp-2022-330175supp001.pdf]

## Supplementary Material

### MATERIALS AND METHODS

#### Study design and participants

This longitudinal prospective study involved the enrolment of PwMS and health care workers (HCWs) at the MS Centre of the Department of Neurosciences of San Camillo Forlanini Hospital (Rome, Italy) and at the National Institute for Infectious Diseases (INMI)-Lazzaro Spallanzani-IRCCS (Rome, Italy). For PwMS, the inclusion criteria were: 1) diagnosis of relapsing-remitting MS based on McDonald 2017 criteria [22]; 2) ongoing DMTs with ocrelizumab, fingolimod, cladribine or IFN- $\beta$  for at least 6 months prior to the study entry, 3) completion of the first vaccination cycle of mRNA vaccines (BNT162b2 or mRNA-1273), and booster dose performance within the previous 4–6 weeks and 4) absence of relapses and/or steroids treatment during the last 3 months before study entry.

For PwMS undergoing ocrelizumab and cladribine therapy, the vaccination timing after the last DMT administration was established according to the European Academy of Neurology for COVID-19 vaccination guidelines. In detail, ocrelizumab was provided after 3 months, while cladribine with at least 4 weeks of delay. IFN- $\beta$  and fingolimod therapies were not interrupted at the time of vaccination.

HCWs were used as healthy control group (some were included in our previous study [23]). The inclusion criteria for their enrolment were: no immunosuppression condition and having received the completed SARS-CoV-2 vaccination cycle and the booster dose as reported above for PwMS.

The exclusion criteria for both cohorts were: previous SARS-CoV-2 infection, HIV infection, age <18 years.

The follow-up study was performed on 30 HCWs and 19 PwMS providing blood samples after both 6 months from the first vaccine dose (T2) and 4-6 weeks from the booster dose (T3) (**Figure 1A**).

Blood samples of both PwMS and HCWs were collected in heparinized tubes and processed by the same researchers' group at INMI within 2 hours from collection using a standardized protocol [24]. The study was approved by the Ethical Committee of INMI "L. Spallanzani"-IRCCS (approval numbers 247/2021, 297/2021 and 319/2021). Study protocols followed the ethics principles for human experimentation in agreement with the Declaration of Helsinki. A written informed consent was signed by all participants before the study procedures.

### **Anti-SARS-CoV-2 antibody assays**

Antibody response was evaluated by measuring anti-nucleoprotein-immunoglobulin G (Anti-N-IgG) and anti-Receptor-Binding Domain (RBD)-IgG using commercial kits (Architect® i2000sr Abbott Diagnostics, Chicago, IL, USA). Anti-N-IgG were reported as index value (sample/Cut-off) and considered positive if  $\geq 1.4$ . Anti-RBD-IgG were expressed as binding antibody units (BAU)/mL and indicated as positive when  $\geq 7.1$ .

### **IFN- $\gamma$ release assay (IGRA)**

To evaluate the IFN- $\gamma$ -specific T-cell response, whole blood was stimulated with a peptide mix (0.1  $\mu\text{g}/\text{mL}$  of each peptide pool) covering the whole SARS-CoV-2 spike protein (PepTivator® Prot\_S1, Prot\_S, and Prot\_S+, Miltenyi Biotec, Germany) or with the staphylococcal enterotoxin B (SEB) (Merck Life Science, cat. S4881) at 200  $\text{ng}/\text{mL}$ , as positive control, and incubated for 20-24h at 37°C [24,25]. After incubation, plasma was harvested and IFN- $\gamma$  levels were measured using an automatic ELISA (ELLA, protein simple, R&D Systems, MN, USA) as per manufacturer's instructions. IFN- $\gamma$  values of the stimulated samples were subtracted from the unstimulated-control value. The detection limit of the assay is 0.17  $\text{pg}/\text{mL}$ . IFN- $\gamma$  levels  $\geq 16$   $\text{pg}/\text{mL}$  were considered positive.

### **Th1 intracellular cytokines and phenotype evaluation by flow cytometry analysis**

Fresh whole blood (600  $\mu$ L) was overnight stimulated with spike protein or SEB together with a-CD28 and a-CD49d (1  $\mu$ g/mL each). After incubation, Brefeldin A (10  $\mu$ g/mL) was added for the last 5h to inhibit cytokine release. Afterwards, samples were stained with Fixable viability stain 700, fixed and then frozen [12, 23].

Stimulated cells were thawed and stained with antibodies as reported [12, 23] (see **Supplementary Table 1** for the complete list of antibodies/reagents and **Supplementary Figure 1** for gating strategy). Samples were acquired on a DxFlex cytometer (Beckman Coulter) and analysed with FlowJo software (version 10.8.1, Tree Star). We evaluated the T-cell specific response as frequency of CD4<sup>+</sup> and CD8<sup>+</sup> T cells producing only IFN- $\gamma$ , IL-2 or TNF- $\alpha$ , or total Th1 (IFN- $\gamma$  and/or IL-2 and/or TNF- $\alpha$ ). T-cell response was defined positive if the following conditions were satisfied: 1) the percentage of SARS-CoV-2-spike stimulated cells was at least 2-fold higher than the unstimulated control; 2) at least 10 events were detected within the cytokine gate. Cytokine production of the unstimulated condition was subtracted to each stimulated condition. T-cell phenotype of total CD4<sup>+</sup> and CD8<sup>+</sup> T cells and antigen-specific T cells producing any Th1 cytokine was evaluated according to the expression of CD45RA and CCR7.

### Statistical analysis

Data were analyzed using GraphPad software (GraphPad Prism v.9.3.1). Continuous and categorical variables were reported respectively as median and interquartile range (IQR) and count and proportion. The following non-parametric statistical inference tests were performed: Friedman test for comparisons among groups of paired data followed by Dunn's multiple comparisons test, Mann-Whitney and Wilcoxon signed-rank tests for pairwise comparisons (for unpaired and paired data, respectively) and Chi-square and McNemar tests for proportions (for unpaired and paired data, respectively). Two-tailed p values <0.05 were considered significant.

## Supplementary Tables

Supplementary Table 1. List of antibodies and reagents for flow cytometry analysis.

|                                                                | Antibodies/Reagents                               | Cat#      | From            |
|----------------------------------------------------------------|---------------------------------------------------|-----------|-----------------|
| <b>T-cell Panel</b>                                            | Fixable Viability stain 700 APC-R700              | 564997    | BD Bioscience   |
|                                                                | CD3 V450                                          | 560365    | BD Bioscience   |
|                                                                | CD4 ECD                                           | 6604727   | Beckman Coulter |
|                                                                | CD8 APC-H7                                        | 611400    | BD Bioscience   |
|                                                                | CD45RA PE-CY7                                     | 337186    | BD Bioscience   |
|                                                                | TNF $\alpha$ FITC                                 | 552889    | BD Bioscience   |
|                                                                | IFN $\gamma$ BV510                                | 563287    | BD Bioscience   |
|                                                                | IL2 PerCp-Cy5.5                                   | 560708    | BD Bioscience   |
|                                                                | CCR7 AF647                                        | 560816    | BD Bioscience   |
| <b><i>in vitro</i> stimulation and flow cytometry reagents</b> | purified human antiCD28                           | 555726    | BD Bioscience   |
|                                                                | purified human antiCD49d                          | 555502    | BD Bioscience   |
|                                                                | Brefeldin A                                       | B7450     | Sigma-Aldrich   |
|                                                                | BD FACS Lysing Solution                           | 349202    | BD Bioscience   |
|                                                                | BD Horizon Brilliant Stain buffer                 | 563794    | BD Bioscience   |
|                                                                | Perm Wash Buffer (Cytotfix/Cytoperm solution kit) | 51-2091KZ | BD Bioscience   |
|                                                                | Formaldehyde                                      | 415666    | Carlo Erba      |

Supplementary Table 2. Impact of the characteristics of MS patients and HCWs on humoral and IFN- $\gamma$ -T cell responses

| Characteristics | T2                    |        |                     |        | T3           |        |                     |        |       |
|-----------------|-----------------------|--------|---------------------|--------|--------------|--------|---------------------|--------|-------|
|                 | Anti-RBD Abs          |        | Spike IFN- $\gamma$ |        | Anti-RBD Abs |        | Spike IFN- $\gamma$ |        |       |
|                 | rho                   | p      | rho                 | p      | rho          | p      | rho                 | p      |       |
| <b>PwMS</b>     | <b>Age</b>            | 0.071  | 0.752               | -0.359 | 0.100        | 0.0139 | 0.951               | -0.041 | 0.853 |
|                 | <b>Male vs Female</b> | na     | 0.584               | na     | 0.05         | na     | 0.437               | na     | 0.05  |
| <b>HCWs</b>     | <b>Age</b>            | -0.311 | 0.094               | -0.238 | 0.241        | 0.022  | 0.907               | 0.061  | 0.749 |
|                 | <b>Male vs Female</b> | na     | 0.188               | na     | >0.999       | na     | 0.327               | na     | 0.588 |

**Footnotes:** Mann-Whitney test for categorical variables; Spearman's correlation was performed for continuous variables; rho: Spearman's correlation coefficient. Na, not applicable.

## Supplementary Figures

## Supplementary Figure 1

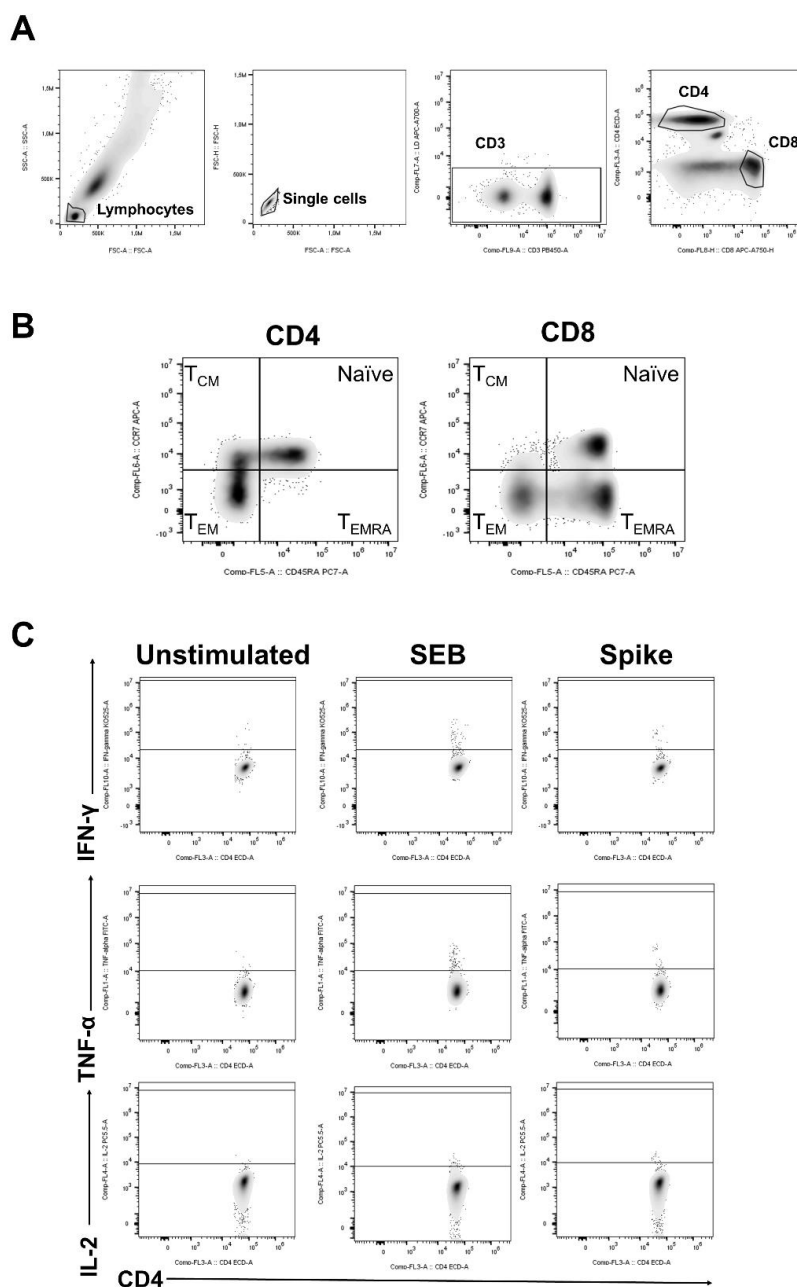

**Supplementary Figure 1.** Gating strategy to detect SARS-CoV-2 reactive CD4<sup>+</sup> and CD8<sup>+</sup> T cells shown in a representative HCW. (A) Lymphocytes were gated based on FSC-A and SSC-A parameters, doublets were excluded (FSC-A/FSC-H), and CD4<sup>+</sup> and CD8<sup>+</sup> T cells were gated

within CD3<sup>+</sup> T cells. **(B)** The expression of CD45RA and CCR7 in total CD4<sup>+</sup> and CD8<sup>+</sup> T cells was used to evaluate T-cell phenotype. **(C)** Representative cytokine panels used for both CD4<sup>+</sup> and CD8<sup>+</sup> T cells are shown for unstimulated, SEB and spike conditions. Abbreviations: HCWs, health care workers; T<sub>CM</sub>, central memory; T<sub>EM</sub>, effector memory; T<sub>EMRA</sub>, terminally differentiated effector memory; FSC, forward scatter; SSC, side scatter; SEB, staphylococcal enterotoxin B; IFN, interferon; IL, interleukin; TNF, tumour necrosis factor.

### Supplementary Figure 2

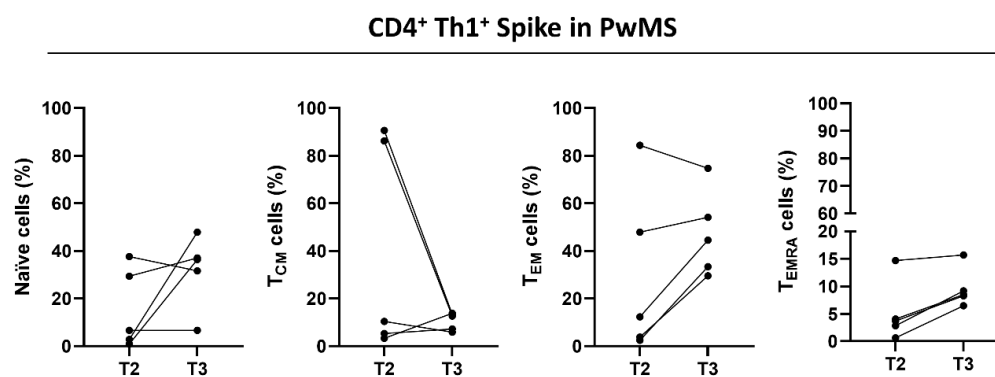

**Supplementary Figure 2. CD4<sup>+</sup> Th1<sup>+</sup> T-cell phenotype in PwMS longitudinally sampled at T2 and T3.** CD4<sup>+</sup> T-cell memory subsets were evaluated in PwMS after 6 months from the first vaccine dose (T2) and after 4-6 weeks from the booster dose (T3) in Th1-responders found at T3. Data were analysed using Wilcoxon matched pairs signed rank test and p values <0.05 were considered significant. Each dot represents a different PwMS. Abbreviations: PwMS, patients with multiple sclerosis; T<sub>CM</sub>, central memory; T<sub>EM</sub>, effector memory; T<sub>EMRA</sub>, terminally differentiated effector memory.
